# Supplementary material
Source: Research Square preprint supplement (doi:10.21203/rs.3.rs-9481585/v1)

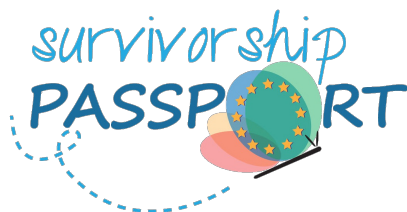

## SUMMARY OF CANCER TREATMENT

This "Survivorship Passport" is a short summary extracted from the information reported in the medical record. It describes the disease and its clinical course as well the treatments you received. This document does not replace the medical record that is always available at our center. This document does not replace the medical record which is always available at the treatment center in case of need

Passport Number: 22025092913

### PERSONAL DATA

|                |                      |          |        |
|----------------|----------------------|----------|--------|
| Name           | TEST                 | Lastname | TEST   |
| Date of birth  | 01/01/1998           | Sex      | Female |
| Place of birth | PLACE OF BIRTH       |          |        |
| Email          | test.test@outlook.it |          |        |
| Mobile phone   | 1123456789           |          |        |

### DIAGNOSIS

|                        |                                             |
|------------------------|---------------------------------------------|
| Date of diagnosis      | 10/08/1998                                  |
| Institution            | Center 002                                  |
| Classification         | 3 - Malignant, primary site                 |
| Diagnosis              | Juvenile myelomonocytic leukemia            |
| Diagnosis (morphology) | Juvenile myelomonocytic leukemia            |
| Site                   | Bone marrow                                 |
| Laterality             | Not applicable (Tumor in a not paired site) |
| Metastatic             | No                                          |
| Genetic markers        | Genetic markers                             |
| Stage/Risk             | Stage/Risk                                  |

### OTHER DISEASES

|                                                                                  |    |
|----------------------------------------------------------------------------------|----|
| Hereditary Cancer Predisposition Syndrome or medical condition cancer associated | No |
| Other medical conditions, not cancer associated                                  | No |

### FIRST-LINE TREATMENTS

|                                                 |                                                                                    |
|-------------------------------------------------|------------------------------------------------------------------------------------|
| The treatment has been executed following       | Personalized                                                                       |
| If personalized, specify                        | PERSONALIZED PROTOCOL WITH THIIOGUANINE AND LOW DOSES OF CYTARABINE, FLAG PROTOCOL |
| Summary of major treatments                     | Chemotherapy Yes<br>HSCT Yes<br>Radiotherapy Yes<br>Major Surgery Yes              |
| Progression/Relapse during first-line treatment | Yes                                                                                |
| Date of first elective end of treatment         | 25/06/2001                                                                         |
| Complete remission                              | NK                                                                                 |

### CHEMOTHERAPY

#### FIRST LINE

|            |            |          |            |
|------------|------------|----------|------------|
| Start date | 18/08/1998 | End date | 24/06/2001 |
|------------|------------|----------|------------|

#### ANTINEOPLASTIC AGENTS

| Drug name        | Total cumulative dose  | Measure unit |
|------------------|------------------------|--------------|
| Cyclophosphamide | 6500 (Dose estimated)  | mg/m2        |
| Melphalan        | 138.38 (Dose given)    | mg/m2        |
| Busulfan         | 270.98 (Dose given)    | mg/m2        |
| Thiotepa         | 440.44 (Dose given)    | mg/m2        |
| Methotrexate     | 19.19 (Dose given)     | gr/m2        |
| Thioguanine      | NC                     | -            |
| Fludarabine      | 140 (Dose estimated)   | mg/m2        |
| Cytarabine       | 20666 (Dose estimated) | mg/m2        |
| Etoposide        | 1868 (Dose given)      | mg/m2        |
| Filgrastim       | NC                     | -            |
| Alemtuzumab      | NC                     | -            |
| Infliximab       | NC                     | -            |

|                              |    |   |
|------------------------------|----|---|
| Ciclosporin                  | NC | - |
| Tacrolimus                   | NC | - |
| Intrathecal injections ( 0 ) | No |   |

#### OTHER TREATMENTS

|                  |    |
|------------------|----|
| Other treatments | No |
|------------------|----|

#### HSCT

##### CLINICAL COURSE

|                                                       |                              |
|-------------------------------------------------------|------------------------------|
| Date of transplant                                    | 25/06/2001                   |
| Type of transplant                                    | Allogenic                    |
| Type of donor for allogenic transplant                | matched related              |
| Type of donor for matched related donor               | matched related – sibling    |
| Source of cells                                       | bone marrow                  |
| Conditioning regimen: drugs used                      | busulfan, endoxan, melphalan |
| GVHD prophylaxis                                      | Yes                          |
| GVHD Acute                                            | Yes, Grade: 2                |
| GVHD Chronic                                          | No                           |
| Organs affected                                       | cute                         |
| Blood type before transplant                          | O (Rh +)                     |
| Blood type after transplant                           | O (Rh +)                     |
| Date of end of immunosuppressive treatment after HSCT | 10/02/2002                   |

#### RADIATION THERAPY EPISODE

##### FIRST LINE

|                      |                                                                         |          |            |
|----------------------|-------------------------------------------------------------------------|----------|------------|
| Type of radiotherapy | External beam: Linac (Linear Accelerator) megavoltage MV X Rays/photons |          |            |
| Start date           | 17/06/2001                                                              | End date | 19/06/2001 |
| Site (1)             | Total body irradiation (TBI) entire body                                | Dose     | 9.9 Gy     |
| Position             | NK                                                                      |          |            |
| Shieldin             | No                                                                      |          |            |

#### MAJOR SURGERY

##### FIRST LINE

|                     |             |
|---------------------|-------------|
| Date of surgery     | 30/03/2001  |
| Surgery description | Splenectomy |
| Sacrificed Organs   | Spleen      |

#### OTHER RELEVANT CLINICAL INFORMATION AND EVENTS

##### CLINICAL COURSE

|                                     |                                  |
|-------------------------------------|----------------------------------|
| Important toxicity during treatment | Yes                              |
| Toxicity number                     | 1                                |
|                                     | <b>First toxicity</b>            |
| Date of event                       | 03/06/1999                       |
| Description                         | Acinetobacter CVC-related sepsis |
| Resolved                            | Yes                              |
| CVC positioning                     | Yes (Removed)                    |
| If yes, specify the site            | jugular vein                     |
| Catheter-related thrombosis         | No                               |
| Transfusion                         | Yes                              |
| Last transfusion date               | 20/08/2001                       |
| Fertility preservation              | No                               |

**CURRENT CHRONIC CONDITIONS:** Gynecological: hypergonadotropic hypogonadism since 2007 currently undergoing therapy Thyroid: hyperthyrotropinemia with normal FT4 Metabolic: familial hypercholesterolemia, under treatment and cardiologic control Bone: Osteoporosi under D Vit

## RECOMMENDATIONS FOR FOLLOW-UP

### FOLLOW-UP RECOMMENDATIONS:

Here below are listed personalized follow-up recommendations, based on the treatments you received.

These advices are based on international experience with people who received similar treatments as you. They are meant to prevent and/or diagnose at an early stage possible future complications.

#### General recommendations:

A healthy lifestyle helps to maintain physical and mental wellbeing, as well as preventing possible diseases such as cardiovascular complications, tumors, and psychological problems. We therefore recommend you to:

- Maintain a normal body weight and engage in regular physical activity
- Eat plenty of fruits and vegetables, and reduce fat, sugar, and salt intake
- Maintain proper dental hygiene
- Avoid excessive sun exposure and remember to use high-protection sunscreen
- Don't smoke and avoid excessive alcohol intake
- Check your blood pressure periodically
- Report to your health care provider any experience of chronic pain, excessive fatigue and/or deterioration of performance in your daily activities (study, work and/or exercise)
- Adhere to all cancer screening programs that will be offered by the health system

The treatment plan created by the "SurPass" Class 1 Medical Device developed from Cineca.

| You could be at risk of                                                                                                                                                                                            | Since you was treated with                                                                                                        | Therefore it is recommended that                                                                                                                                                                                                                                                                                                                                                                                                                                                                                                                                                                                                                                                                            |
|--------------------------------------------------------------------------------------------------------------------------------------------------------------------------------------------------------------------|-----------------------------------------------------------------------------------------------------------------------------------|-------------------------------------------------------------------------------------------------------------------------------------------------------------------------------------------------------------------------------------------------------------------------------------------------------------------------------------------------------------------------------------------------------------------------------------------------------------------------------------------------------------------------------------------------------------------------------------------------------------------------------------------------------------------------------------------------------------|
| <b>Overweight and obesity</b>                                                                                                                                                                                      | - Including TBI                                                                                                                   | Check your weight and height and then calculate your BMI (body mass index) every 2 years (normal adult values 18.5-24.9).                                                                                                                                                                                                                                                                                                                                                                                                                                                                                                                                                                                   |
| <b>Hypothalamic-pituitary (HP) axis problems (Standard risk)</b><br><b>Growth hormone deficiency (GHD)</b><br><b>TSH deficiency (TSHD)</b><br><b>LH/FSH deficiency (LH/FSHD)</b><br><b>ACTH deficiency (ACTHD)</b> | - Radiotherapy to a volume exposing the HP region < 30 Gy                                                                         | In prepubertal period:<br>Perform clinical check-up every 6 months to assess growth velocity and pubertal development.<br>Measure fT4, TSH, and cortisol levels early in the morning every year;<br>in case of lack of progression of pubertal development also check FSH and LH levels.<br><br>In the post-pubertal period:<br>- Perform a clinical check-up every year and in women also check the regularity of the menstrual cycle.<br>- Check blood values of fT4, TSH, LH, FSH, IGF1 and cortisol early in the morning every year.<br>- In men, also check total and free testosterone.<br>- In women also check 17-beta estradiol<br>Continue these check-ups for at least 15 years after diagnosis. |
| <b>Impaired glucose metabolism and diabetes mellitus</b>                                                                                                                                                           | - Including TBI                                                                                                                   | Check blood glucose levels and glycosylated haemoglobin levels at least every 5 years.<br><b>Comments:</b> February 2024: HbAC normal value                                                                                                                                                                                                                                                                                                                                                                                                                                                                                                                                                                 |
| <b>Hypertension</b>                                                                                                                                                                                                | - Including TBI<br>- Immunosuppressives treatment and prolonged steroids as anticancer treatment (at least 4 weeks, continuously) | Check blood pressure at least every 2 years and at every medical examination.                                                                                                                                                                                                                                                                                                                                                                                                                                                                                                                                                                                                                               |
| <b>Osteonecrosis</b>                                                                                                                                                                                               | - HSCT, especially with an history of GVHD<br>- High dose RT                                                                      | Report any persistent bone pain (particularly joint pain) to your doctor.                                                                                                                                                                                                                                                                                                                                                                                                                                                                                                                                                                                                                                   |
| <b>Subsequent breast cancer</b>                                                                                                                                                                                    |                                                                                                                                   | Perform Mammography and Breast magnetic resonance imaging (MRI) should be performed annually from the eighth year after the end of radiotherapy, but not before the age of 25. These examinations should be continued until at least age 60.<br><b>Comments:</b> Added because of radiotherapy dose = 9.9 Gy                                                                                                                                                                                                                                                                                                                                                                                                |
| <b>Subsequent colorectal cancer</b>                                                                                                                                                                                | - Including TBI                                                                                                                   | Check for occult blood in stool every three years from the age of 30. If the test is positive, a colonoscopy should be performed.                                                                                                                                                                                                                                                                                                                                                                                                                                                                                                                                                                           |
| <b>Subsequent CNS neoplasms</b>                                                                                                                                                                                    | - Including TBI                                                                                                                   | Pay attention to the appearance of any neurological symptoms (e.g. persistent headache, visual disturbances, strength deficits) and report them to your doctor to discuss whether a neuro-radiological examination is necessary.                                                                                                                                                                                                                                                                                                                                                                                                                                                                            |

| You could be at risk of                                 | Since you was treated with                                                                                          | Therefore it is recommended that                                                                                                                                                                                                                                                                                                                                                                                                                                                                                                                                                                                                                                                                                                                                                                                                                                                                                                                        |
|---------------------------------------------------------|---------------------------------------------------------------------------------------------------------------------|---------------------------------------------------------------------------------------------------------------------------------------------------------------------------------------------------------------------------------------------------------------------------------------------------------------------------------------------------------------------------------------------------------------------------------------------------------------------------------------------------------------------------------------------------------------------------------------------------------------------------------------------------------------------------------------------------------------------------------------------------------------------------------------------------------------------------------------------------------------------------------------------------------------------------------------------------------|
| <b>Renal problems<br/>(Glomerular dysfunction)</b>      | - Including TBI<br>- HSCT                                                                                           | Perform every 5 years:<br>Urinalysis for creatinuria, proteinuria.<br>Blood test for creatininemia and calculation of glomerular filtration rate (GFR).<br>In case of nephrectomy, non-steroidal anti-inflammatory drugs should be used with caution.                                                                                                                                                                                                                                                                                                                                                                                                                                                                                                                                                                                                                                                                                                   |
| <b>Pulmonary problems</b>                               | - Including TBI<br>- Busulfan<br>- Allogenic HSCT                                                                   | Avoid active and passive smoking;<br>Get annual flu and pneumococcal vaccines as indicated by your pediatrician/general practitioner;<br>Perform a spirometry and carbon monoxide diffusion assessment (DLCO) at least once after the end of treatment and to be repeated in case of abnormalities;<br>A clinical chest check-up must be performed by your pediatrician/ general practitioner at least every 5 years.                                                                                                                                                                                                                                                                                                                                                                                                                                                                                                                                   |
| <b>Liver problems</b>                                   | - Including TBI<br>- HSCT (irrespective of GVHD)<br>- Methotrexate<br>- Mercaptopurine or Thioguanine<br>- Busulfan | Regular clinical evaluation for signs and symptoms of liver dysfunction (e.g. hepatomegaly, spider nevi or pruritus). Transaminases, gammaGT and alkaline phosphatase should be measured at least once after treatment ends.<br>In case of an increase in liver enzyme values:<br>if between 1-2 times the normal value: repeat the test within 1 year.<br>If more than 2 times the normal value: repeat the test within 2 months.<br>In case of persistent liver abnormalities:<br>Ask a hepatologist or gastroenterologist for further indications. If there is no obvious explanation (alcohol, medication, obesity)<br>Avoid or use with caution potentially hepatotoxic drugs and supplements<br>Consider immunisation against hepatitis A and B, if not already immune<br>in case of chronic HBV / HCV infections discuss precautions to reduce viral transmission to family and sexual partners<br><b>Comments:</b> February 2024: normal values |
| <b>Iron overload</b>                                    | - HSCT (irrespective of GVHD)<br>- Multiple red blood cell transfusions                                             | Perform the serum ferritin assay at least once after the end of treatment.<br>Repeat test within 6 months if serum ferritin is above 500 ng/ml.<br>In case of persistent hyperferritinemia, perform an MRI scan to quantify the iron content in the liver.<br>If the latter is confirmed, ask a haematologist about the appropriate treatment (such as phlebotomy or chelation therapy).                                                                                                                                                                                                                                                                                                                                                                                                                                                                                                                                                                |
| <b>Spleen problems</b>                                  | - Splenectomy<br>- Allogenic HSCT (with or without TBI)                                                             | Complete the mandatory vaccination calendar and have pneumococcal, meningococcal and Haemophilus Influenzae vaccinations.<br>Start broad-spectrum antibiotic therapy as soon as possible in case of: fever >38.3°C, animal bite with skin lesions, or other symptoms of severe infection (sepsis) such as cold/chills, low blood pressure, mental confusion and signs of rigidity.<br>In such cases, blood count and blood culture should be performed immediately if possible.<br>If travelling abroad, contact your local health authorities for information on the need for any prophylactic vaccinations.                                                                                                                                                                                                                                                                                                                                           |
| <b>Lower urinary tract problems</b>                     | - Cyclophosphamide<br>- Including TBI                                                                               | Watch out for urinary symptoms (e.g. frequent urination, painful urination, urinary retention or blood in urine).<br>If any of these symptoms occur, perform a urine test and urine culture and, if necessary, a urine cytology test. If the tests are pathological, a urological evaluation should be performed.                                                                                                                                                                                                                                                                                                                                                                                                                                                                                                                                                                                                                                       |
| <b>Gastro-intestinal problems</b>                       | - Including TBI<br>- Abdominal surgery                                                                              | A gastroenterological evaluation should be performed in case of persistent abdominal symptoms such as abdominal pain, nausea, vomiting or bowel evacuation disorders.                                                                                                                                                                                                                                                                                                                                                                                                                                                                                                                                                                                                                                                                                                                                                                                   |
| <b>Subsequent melanoma and non-melanoma skin cancer</b> | - Any RT including TBI (predominantly in the RT field)<br>- HSCT Especially with a history of skin GvHD             | Protect yourself from the sun rays with highly protective sunscreen, especially on areas of the body that have been exposed to radiotherapy.<br>Constantly check your skin paying attention to the appearance of new moles and/or changes in colour and size of those already present.<br>Perform a dermatological check-up for mole mapping at least every 2 years.                                                                                                                                                                                                                                                                                                                                                                                                                                                                                                                                                                                    |

|                                                                  | Planned for                                                  |
|------------------------------------------------------------------|--------------------------------------------------------------|
| <b>Hypothalamic-pituitary (HP) axis problems (Standard risk)</b> |                                                              |
| <b>Growth hormone deficiency (GHD)</b>                           |                                                              |
| <b>TSH deficiency (TSHD)</b>                                     | October 2024: Endocrinological visit scheduled in our center |
| <b>LH/FSH deficiency (LH/FSHD)</b>                               |                                                              |
| <b>ACTH deficiency (ACTHD)</b>                                   |                                                              |
| <b>Impaired glucose metabolism and diabetes melitus</b>          | 2026: Home check-up with medical request                     |
| <b>Subsequent breast cancer</b>                                  | 2026: Control scheduled in our center                        |
| <b>Subsequent colorectal cancer</b>                              | 2029: Home check-up with medical request                     |
| <b>Renal problems (Glomerular dysfunction)</b>                   | 2026: Home check-up with medical request                     |

Data are updated to the date of issue of the passport or the date of the last clinical examination certified by the physician.

Passport issued by            DE  
Institution                      Center 002  
Date of issue                    09/10/2025

Signature of the doctor in charge:

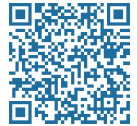

Supplement: Supplementary file 3 [file 5c85227f2f70dfde10906227.pdf]
