# Supplementary material
Source: Research Square preprint supplement (doi:10.21203/rs.3.rs-9481585/v1)
Supplement: Supplementary file 1 [file 3745ed6dbdab4191b8829918.docx]

**Table 1 list of the IGHG PanCare recommendations without screening test and their related algorithms**

| N | Recommendation | N | Algorithm for |
| --- | --- | --- | --- |
| 1 | Cerebrovascular problems | 1 | Cerebrovascular problem: Carotid artery disease, Cerebrovascular accidents, Aneurysm, Cavernomas |
| 2 | Craniofacial growth problems | 2 | Craniofacial growth problems |
| 3 | Dental and oral problems | 3 | Dental and oral problems |
| 4 | Eye problems | 4 | Cataract |
| 5 | Lacrimal duct atrophy, Xerophtalmia, Keratitis, Telangiectasias, Retinopathy, Optic chiasm neuropathy, Chronic painful eye, Maculopathy, Papillopathy, Visual field deficits, Glaucoma |
| 5 | Spleen problems | 6 | Spleen problems |
| 6 | Bone problems ~~^~~ | 7 | Osteonecrosis |
| 7 | Spine scoliosis and kyphosis | 8 | Spine scoliosis and kyphosis |
| 8 | Alopecia | / | None* |
| 9 | Fatigue | / | None* |
| 10 | Health promotion | / | None* |
| 11 | Mental health problems | / | None* |
| 12 | Pain (chronic) | / | None* |
| 13 | Psychosocial problems | / | None* |
| 14 | Neurocognitive problems | 9 | Neurocognitive problems |
| 15 | Lower urinary tract problems | 10 | Lower urinary tract problems |
| 16 | Gastro-intestinal problems | 11 | Gastro-intestinal problems |
| 17 | Peripheral neuropathy | 12 | Peripheral neuropathy |
| 18 | Obstetric problems (female) | 13 | Obstetric problems |
| 19 | Melanoma and non-melanoma skin cancer | 14 | Subsequent melanoma and non-melanoma skin cancer |
| 20 | Subsequent neoplasms | 15 | Subsequent oral cancer |
| 16 | Subsequent acute myeloid leukaemia or myelodysplasia: |
| 17 | Subsequent bladder cancer |
| 18 | Subsequent bone cancer |
| 19 | Subsequent lung cancer |
| 20 | Tumor predisposition |

^: Recommendations for Reduced Bone mineral density included among recommendations with screening

**Table 2 list of the IGHG PanCare recommendations with screening test and the related algorithms**

| N | Recommendation | N | Algorithm for |
| --- | --- | --- | --- |
| 1 | Cardiac problems (arrhythmia) | 1 | Arrhythmia (only) |
| 2 | Cardiac problems (cardiomyopathy) | 2 | Arrhythmia, pericardial disease, valvular heart disease, cardiomyopathy at Standard (moderate) risk |
| 3 | Cardiac problems (pericardial disease) |
| 3 | Arrhythmia, pericardial disease, valvular heart disease, cardiomyopathy at High risk |
| 4 | Cardiac problems (valvular heart disease) |
| 5 | Coronary artery disease (asymptomatic) | / | None* |
| 6 | Bone problems ~~^~~ | 4 | Reduced bone mineral density |
| 7 | Subsequent breast cancer (female) | 5 | Breast cancer (female) |
| 8 | Subsequent CNS neoplasms | 6 | CNS subsequent neoplasms |
| 9 | Subsequent colorectal cancer n | 7 | Subsequent colorectal cancer |
| 10 | Subsequent thyroid cancer | 8 | Thyroid cancer |
| 11 | Ear problems | 9 | Ear problems |
| 12 | Fertility problems and sexual dysfunction (male) | 10 | Fertility |
| 11 | Testosterone deficiency |
| 12 | Sexual dysfunction |
| 13 | HP axis problems | 13 | High risk |
| 14 | Moderate risk |
| 14 | Late liver injury | 15 | Late liver injury |
| 15 | Dyslipidaemia | 16 | Dyslipidaemia |
| 16 | Hypertension | 17 | Hypertension |
| 17 | Impaired glucose metabolism and diabetes mellitus | 18 | Impaired glucose metabolism and diabetes mellitus |
| 18 | Overweight and obesity | 19 | Overweight and obesity |
| 19 | Iron overload | 20 | Iron overload |
| 20 | Precocious puberty (central) | 21 | Males |
| 22 | Females |
| 21 | Premature ovarian insufficiency (female) | 23 | Premature ovarian insufficiency (female) |
| 22 | Pulmonary problems | 24 | Pulmonary problems |
| 23 | Renal problems | 25 | Glomerular dysfunction |
| 26 | Glomerular and tubular dysfunction |
| 24 | Thyroid function problems | 27 | Thyroid function problems |

*: included among recommendations with screening although no specific algorithm was designed since the recommended surveillance was that for modifiable cardiovascular disease risk factors (included in the general recommendations at the beginning of the recommendations section)

^: Recommendations for Osteonecrosis included among recommendations without screening test

**Table 3**. **Characteristics of 207 CCS enrolled in the Italian PanCareFollowUp cohort study who received a digital SurPass**

| **Gender, n (%)** |  |
| --- | --- |
| Male | 105 (50.7) |
| Female | 102 (49.3) |
| **Age at diagnosis,**  **years, median (IQR), range** | 6.5 (3.6-11.7), 0.2-18.9 |
| **Age at diagnosis category, years (%)** |  |
| <5 | 86 (41.5) |
| 5-9 | 50 (24.2) |
| 10-14 | 56 (27.1) |
| 15-19 | 15 (7.2) |
| **Type of cancer, n (%)** |  |
| Leukemia | 80 (38.6) |
| Lymphoma | 44 (21.3) |
| Bone sarcoma | 24 (11.6) |
| Neuroblastoma | 24 (11.6) |
| Renal tumor | 19 (9.2) |
| Soft tissue sarcoma | 12 (5.8) |
| Germ cell tumor | 4 (1.9) |
| **Years from OT to enrollment,**  **median (IQR), range** | 14.9 (10.8-19.9), 4.3-40.1 |
| **Age at enrolment,**  **years, median (IQR), range** | 22.7 (19.6-28.3), 16-50.2 |
| **Age at enrolment category, years (%)** |  |
| 16-19 | 57 (27.5) |
| 20-29 | 110 (53.1) |
| 30-39 | 28 (13.5) |
| ≥40 | 12 (5.8) |
| **Relapses after 1st OT, n (%)** | 27 (13) |
| **SNM^, n (%)** | 13^^ (6.2) |

^: SNM = Subsequent Malignant Neoplasms.

^^ Details of the SNM: 7 thyroid, 3 non-melanoma skin cancer, 1 breast, 1 salivary gland carcinoma, 1 giant cell bone tumor.

**Table 4: Recommendations automatically suggested by SurPass algorithms and reasons for deselection or addition among 207 PCFU delivered SurPass v1.2**

|  |  | **Action** | | | |  |
| --- | --- | --- | --- | --- | --- | --- |
|  | **Suggested by algorithms** | **Deselected and further individualized** | | **Deselected** | **Added** |  |
| **Recommendation for** | **N (%)^** | **Preexisting complication**  **N (%)*** | **Already in a more intensive screening**  **N (%)*** | **Normal values of test to be performed once**  **N (%)*** | **HCP's decision**  **N** | **Finally included in the individualized SurPass**  **N** |
| *Endocrine and fertility problems* | *531 (32.2)* | *84 (15.8)* | *0* | *0* | *1* | *448* |
| Reduced bone mineral density | 157 (9.5) | 16 (10.2) | 0 | 0 | 0 | 141 |
| Thyroid function problems | 83 (5.0) | 23 (27.7) | 0 | 0 | 0 | 60 |
| HP axis problems High Risk | 12 (0.7) | 4 (33.3) | 0 | 0 | 0 | 8 |
| HP axis problems Low Risk | 20 (1.2) | 9 (45) | 0 | 0 | 0 | 11 |
| Male fertility | 93 (5.6) | 13 (14.0) | 0 | 0 | 0 | 80 |
| Testosterone deficiency | 17 (1.0) | 3 (17.6) | 0 | 0 | 1^^ | 15 |
| Sexual dysfunction | 22 (1.3) | 0 | 0 | 0 | 0 | 22 |
| Premature Ovarian insufficiency | 85 (5.2) | 12 (14.1) | 0 | 0 | 0 | 73 |
| Central Precocious Puberty girls | 0 | 0 | 0 | 0 | 0 | 0 |
| Central Precocious Puberty boys | 0 | 0 | 0 | 0 | 0 | 0 |
| Impaired glucose metabolism and diabetes mellitus | 42 (2.5) | 4 (9.5) | 0 | 0 | 0 | 38 |
| *Metabolic problems* | *220 (13.3)* | *14 (6.4)* | *1 (0.4)* | *0* | *0* | *205* |
| Hypertension | 134 (8.1) | 2 (1.5) | 1 (0.7) | 0 | 0 | 131 |
| Overweight and Obesity | 32 (1.9) | 3 (9.4) | 0 | 0 | 0 | 29 |
| Dyslipidemia | 54 (3.3) | 9 (16.7) | 0 | 0 | 0 | 45 |
| *Cardiac problems* | *190 (11.5)* | *7 (3.7)* | *0* | *0* | *0* | *183* |
| High Risk cardiomyopathy | 78 (4.7) | 4 (5.1) | 0 | 0 | 0 | 74 |
| Standard Risk cardiomyopathy | 100 (6.1) | 3 (3) | 0 | 0 | 0 | 97 |
| Arrhythmia only | 12 (0.7) | 0 | 0 | 0 | 0 | 12 |
| *Subsequent malignant neoplasms* | *173 (10.5)* | *10 (5.8)* | *10 (5.7)* | *0* | *1* | *154* |
| Thyroid cancer | 72 (4.4) | 7 (9.7) | 10 (13.9) | 0 | 0 | 55 |
| Colorectal cancer | 43 (2.6) | 0 | 0 | 0 | 0 | 43 |
| CNS neoplasm | 32 (1.9) | 2 (6.3) | 0 | 0 | 0 | 30 |
| Breast cancer | 26 (1.6) | 1 (3.8) | 0 | 0 | 1** | 26 |
| *Other* | *530 (32.2)* | *16 (3.0)* | *0* | *94 (17.7)* | *1* | *421* |
| Late Liver injury | 161 (9.8) | 0 | 0 | 37 (23.0) | 0 | 124 |
| Iron overload | 116 (7.1) | 0 | 0 | 57 (49.1) | 0 | 59 |
| Pulmonary problems | 90 (5.5) | 6 (6.7) | 0 | 0 | 0 | 84 |
| Ear problems | 37 (2.3) | 6 (16.2) | 0 | 0 | 1## | 32 |
| Renal problems Glomerular and tubular | 93 (5.7) | 3 (3.2) | 0 | 0 | 0 | 90 |
| Renal problems Glomerular | 33 (2.0) | 1 (3.0) | 0 | 0 | 0 | 32 |
| **TOTAL** | **1644 (100)** | **131 (7.0)** | **11 (0.6)** | **94 (5.7)** | **3** | **1411** |

^= % of column

*= % of row

^^ = High Risk pelvic NB treated with pelvic surgery and alkylating agents

** = AnLL treated with TBI (9.9 Gy) which did not reach the 10 Gy threshold dose for algorithms activation

## = Survivor who had received high doses (2,045 mg/m2) of carboplatin.
