# Supplementary material
Source: Research Square preprint supplement (doi:10.21203/rs.3.rs-9481585/v1)
Supplement: Supplementary file 2 [file 3e2faa7143ab82060dce1ac3.docx]

**Appendix A:**

**PanCareSurPass Consortium**

Desiree Grabow – Universitaetsmedizin der Johannes Gutenberg-Universitaet Mainz
Anna-Liesa Filbert – Universitaetsmedizin der Johannes Gutenberg-Universitaet Mainz
Lisa Knörr – Universitaetsmedizin der Johannes Gutenberg-Universitaet Mainz
Dorothea Niehoff – Universitaetsmedizin der Johannes Gutenberg-Universitaet Mainz
Diana Walz – Universitaetsmedizin der Johannes Gutenberg-Universitaet Mainz
Claudia Spix – Universitaetsmedizin der Johannes Gutenberg-Universitaet Mainz
Cecile Ronckers – Universitaetsmedizin der Johannes Gutenberg-Universitaet Mainz

Riccardo Haupt – DOPO Clinic, Division of Pediatric Hematology and Oncology, IRCCS Istituto Giannina Gaslini Genoa, Italy
Monica Muraca – DOPO Clinic, Division of Pediatric Hematology and Oncology, IRCCS Istituto Giannina Gaslini Genoa, Italy
Simone Lightwood – DOPO Clinic, Division of Pediatric Hematology and Oncology, IRCCS Istituto Giannina Gaslini Genoa, Italy
Francesca Bagnasco – DOPO Clinic, Division of Pediatric Hematology and Oncology, IRCCS Istituto Giannina Gaslini Genoa, Italy
Giacomo Cavalca – DOPO Clinic, Division of Pediatric Hematology and Oncology, IRCCS Istituto Giannina Gaslini Genoa, Italy
Sara Oberti – DOPO Clinic, Division of Pediatric Hematology and Oncology, IRCCS Istituto Giannina Gaslini Genoa, Italy
Brigitte Nicolas – DOPO Clinic, Division of Pediatric Hematology and Oncology, IRCCS Istituto Giannina Gaslini Genoa, Italy
Ramona Tallone – DOPO Clinic, Division of Pediatric Hematology and Oncology, IRCCS Istituto Giannina Gaslini Genoa, Italy
Andrea Beccaria – DOPO Clinic, Division of Pediatric Hematology and Oncology, IRCCS Istituto Giannina Gaslini Genoa, Italy
Lisa Pelanconi– DOPO Clinic, Division of Pediatric Hematology and Oncology, IRCCS Istituto Giannina Gaslini Genoa, Italy

Sonia di Profio –IRCCS Istituto Giannina Gaslini Genoa, Italy

Laura Accame– IRCCS Istituto Giannina Gaslini Genoa, Italy

Ruth Ladenstein – St. Anna Children’s Cancer Research Institute / St Anna Children’s Hospital
Edit Bardi – St. Anna Children’s Cancer Research Institute / St Anna Children’s Hospital
Serena Mancini – St. Anna Children’s Cancer Research Institute / St Anna Children’s Hospital

Anne Uyttebroeck – Katholieke Universiteit Leuven
Maria van Helvoirt – Katholieke Universiteit Leuven

Karen Van Beek – Katholieke Universiteit Leuven
Jurgen Lemiere – Katholieke Universiteit Leuven
Marleen Renard – Katholieke Universiteit Leuven
An Michiels – Katholieke Universiteit Leuven

Thorsten Langer – Universitaet zu Luebeck
Ann-Kristin Kock-Schoppenhauer – Universitaet zu Luebeck
Judith Gebauer – Universitaet zu Luebeck
Sarah Rieken – Universitaet zu Luebeck
Lea Hildebrand – Universitaet zu Luebeck
Anke Neumann – Universitaet zu Luebeck

Jelena Rascon – Viesoji Istaiga Vilniaus Universiteto Ligonine Santaros Klinikos

Monika Kapitančukė – Viesoji Istaiga Vilniaus Universiteto Ligonine Santaros Klinikos

Eglė Stukaite-Ruibiene – Viesoji Istaiga Vilniaus Universiteto Ligonine Santaros Klinikos

Justas Trinkūnas – Viesoji Istaiga Vilniaus Universiteto Ligonine Santaros Klinikos

Audronė Ciesiūnienė – Viesoji Istaiga Vilniaus Universiteto Ligonine Santaros Klinikos

Paulius Ragauskas – Viesoji Istaiga Vilniaus Universiteto Ligonine Santaros Klinikos

Renata Blackute – Viesoji Istaiga Vilniaus Universiteto Ligonine Santaros Klinikos

Adela Cañete Nieto – Instituto de Investigación Sanitaria La Fe – Hospital Universitario y Politécnico La Fe
Julia Balaguer Guill – Instituto de Investigación Sanitaria La Fe – Hospital Universitario y Politécnico La Fe
Maria Teresa Tormo Alcañiz – Instituto de Investigación Sanitaria La Fe – Hospital Universitario y Politécnico La Fe
Antonio Orduña Galan – Instituto de Investigación Sanitaria La Fe – Hospital Universitario y Politécnico La Fe
Marisa Correcher Palau – Instituto de Investigación Sanitaria La Fe – Hospital Universitario y Politécnico La Fe
Lucas Cervero Beltrán – Instituto de Investigación Sanitaria La Fe – Hospital Universitario y Politécnico La Fe
Vicente Pons Tamarit – Instituto de Investigación Sanitaria La Fe – Hospital Universitario y Politécnico La Fe

Davide Saraceno – Cineca Consorzio interuniversitario
Alessandra Berti – Cineca Consorzio interuniversitario
Carlo Contino – Cineca Consorzio interuniversitario
Nikos Thomopulos – Cineca Consorzio interuniversitario
Rita Rielli – Cineca Consorzio interuniversitario

Thokozani Reuben Ngidi– Cineca Consorzio interuniversitario

Günter Schreier – AIT Austrian Institute of Technology GmbH
Stefan Beyer – AIT Austrian Institute of Technology GmbH
Dieter Hayn – AIT Austrian Institute of Technology GmbH
Bernhard Jammerbund – AIT Austrian Institute of Technology GmbH
Angelika Rzepka – AIT Austrian Institute of Technology GmbH

Catherine Chronaki – HL7 International Fondation
Giorgio Cangioli – HL7 International Fondation
Eliana Charalambous – HL7 International Fondation

Roberta Gazzarata - HL7 International Fondation

Gerald Gredinger – Gesundheit Osterreich

Kathrin Trunner – Gesundheit Osterreich

Florian Trauner – Gesundheit Osterreich

Anja Laschkolnig – Gesundheit Osterreich

Alexander Degelsegger-Márquez – Gesundheit Osterreich

Leontien Kremer – Prinses Máxima Centrum voor Kinderoncologie
Heleen van der Pal – Prinses Máxima Centrum voor Kinderoncologie
Saskia Pluijm – Prinses Máxima Centrum voor Kinderoncologie
Selina van den Oever – Prinses Máxima Centrum voor Kinderoncologie
Ismay de Beijer – Prinses Máxima Centrum voor Kinderoncologie

Heleen van der Pal – PanCare, Bussum 1401, The Netherlands
Jaap den Hartogh – PanCare, Bussum 1401, The Netherlands
Jeroen te Dorsthorst PanCare, Bussum 1401, The Netherlands

Giorgia Manuzzi – European Society for Paediatric Oncology, Belgium

Anita Kienesberger – Childhood Cancer International Europe, Austria
Hannah Gsell – Childhood Cancer International Europe, Austria
Carina Schneider – Childhood Cancer International Europe, Austria
Zuzana Tomasikova – Childhood Cancer International Europe, Austria

Kylie O’Brien – Pintail LTD

***PanCareFollowUp Consortium***

Leontien C.M. Kremer – Princess Máxima Centre for Paediatric Oncology, Netherlands; Amsterdam UMC, Netherlands; Utrecht University and Medical Centre, Netherlands
Helena J.H. van der Pal – Princess Máxima Centre for Paediatric Oncology, Netherlands; PanCare, Netherlands
Renée L. Mulder – Princess Máxima Centre for Paediatric Oncology, Netherlands
Saskia M.F. Pluijm – Princess Máxima Centre for Paediatric Oncology, Netherlands
Rebecca J. van Kalsbeek – Princess Máxima Centre for Paediatric Oncology, Netherlands
Selina R. van den Oever – Princess Máxima Centre for Paediatric Oncology, Netherlands

Lars Hjorth – Lund University, Skane University Hospital, Sweden
Cecilia Follin – Lund University, Skane University Hospital, Sweden
Lill Eriksson – Lund University, Skane University Hospital, Sweden
Thomas Relander – Lund University, Skane University Hospital, Sweden
Jacob Engellau – Lund University, Skane University Hospital, Sweden
Karin Fjordén – Lund University, Skane University Hospital, Sweden
Karolina Bogefors – Lund University, Skane University Hospital, Sweden
Anna S. Holmqvist – Lund University, Skane University Hospital, Sweden

Riccardo Haupt – DOPO Clinic, Division of Pediatric Hematology and Oncology, IRCCS Istituto Giannina Gaslini Genoa, Italy
Monica Muraca – DOPO Clinic, Division of Pediatric Hematology and Oncology, IRCCS Istituto Giannina Gaslini Genoa, Italy
Brigitte Nicolas – DOPO Clinic, Division of Pediatric Hematology and Oncology, IRCCS Istituto Giannina Gaslini Genoa, Italy
Francesca Bagnasco – DOPO Clinic, Division of Pediatric Hematology and Oncology, IRCCS Istituto Giannina Gaslini Genoa, Italy
Marina Benvenuto – DOPO Clinic, Division of Pediatric Hematology and Oncology, IRCCS Istituto Giannina Gaslini Genoa, Italy
Anna Aulicino – DOPO Clinic, Division of Pediatric Hematology and Oncology, IRCCS Istituto Giannina Gaslini Genoa, Italy
Luca Laudisi – DOPO Clinic, Division of Pediatric Hematology and Oncology, IRCCS Istituto Giannina Gaslini Genoa, Italy

Ramona Tallone – DOPO Clinic, Division of Pediatric Hematology and Oncology, IRCCS Istituto Giannina Gaslini Genoa, Italy

Andrea Beccaria – DOPO Clinic, Division of Pediatric Hematology and Oncology, IRCCS Istituto Giannina Gaslini Genoa, Italy

Vera Araujo-Soares – University of Twente, Netherlands

Tomas Kepak – Masaryk University, Czech Republic
Katerina Kepakova – Masaryk University, Czech Republic
Hana Hrstkova – Masaryk University, Czech Republic
Viera Bajciova – Masaryk University, Czech Republic
Marta Holikova – Masaryk University, Czech Republic
Lucie Strublova – Masaryk University, Czech Republic

Anne Uyttebroeck – KU Leuven / University Hospitals Leuven, Belgium
Marleen Renard – University Hospitals Leuven, Belgium
Sandra Jacobs – KU Leuven / University Hospitals Leuven, Belgium
Heidi Segers – KU Leuven / University Hospitals Leuven, Belgium

Karen Van Beek - University Hospitals Leuven, Belgium
Maria van Helvoirt – University Hospitals Leuven, Belgium

Jeanette F. Winther – Danish Cancer Society Research Centre, Denmark; Aarhus University and Aarhus University Hospital, Denmark
Luzius Mader – Danish Cancer Society Research Centre, Denmark; University of Bern, Switzerland
Line E. Frederiksen – Danish Cancer Society Research Centre, Denmark
Elisabeth A. W. Andersen – Danish Cancer Society Research Centre, Denmark

Gisela Michel – University of Lucerne, Switzerland
Stefan Boes – University of Lucerne, Switzerland
Katharina Roser – University of Lucerne, Switzerland

Jacqueline Loonen – Radboud University Medical Centre, Netherlands
Rosella Hermens – Radboud University Medical Centre, Netherlands
Irene Göttgens – Radboud University Medical Centre, Netherlands
Eline Bouwman – Radboud University Medical Centre, Netherlands
Iridi Stollman – Radboud University Medical Centre, Netherlands
Adriaan Penson – Radboud University Medical Centre, Netherlands
Dionne Breij – Radboud University Medical Centre, Netherlands

Roderick Skinner – Newcastle University; Great North Children's Hospital; Translational and Clinical Research Institute, United Kingdom
Morven C. Brown – Newcastle University, United Kingdom

Vera Araujo-Soares – University of Twente, Netherlands

Anne Blondeel – European Society for Paediatric Oncology, Belgium
William Sciberras – European Society for Paediatric Oncology, Belgium

Joke Korevaar – Netherlands Institute for Health Services Research (Nivel), Netherlands
Mieke Rijken – Netherlands Institute for Health Services Research (Nivel), Netherlands; University of Eastern Finland, Finland

Anita Kienesberger – Childhood Cancer International Europe, Austria
Jaap den Hartogh – Childhood Cancer International Europe, Austria
Hannah Gsell – Childhood Cancer International Europe, Austria
Carina Schneider – Childhood Cancer International Europe, Austria

Edit Bardi – PanCare, Netherlands
Jeroen te Dorsthorst – PanCare, Netherlands
